# Supplementary material for: Argonaute proteins couple chromatin silencing to alternative splicing
Source: Springer Nature journal article supplement (doi:10.1038/nsmb.2373), 2012-09-09
Supplement: 41594_2012_BFnsmb2373_MOESM4_ESM.pdf [file 41594_2012_BFnsmb2373_MOESM4_ESM.pdf]

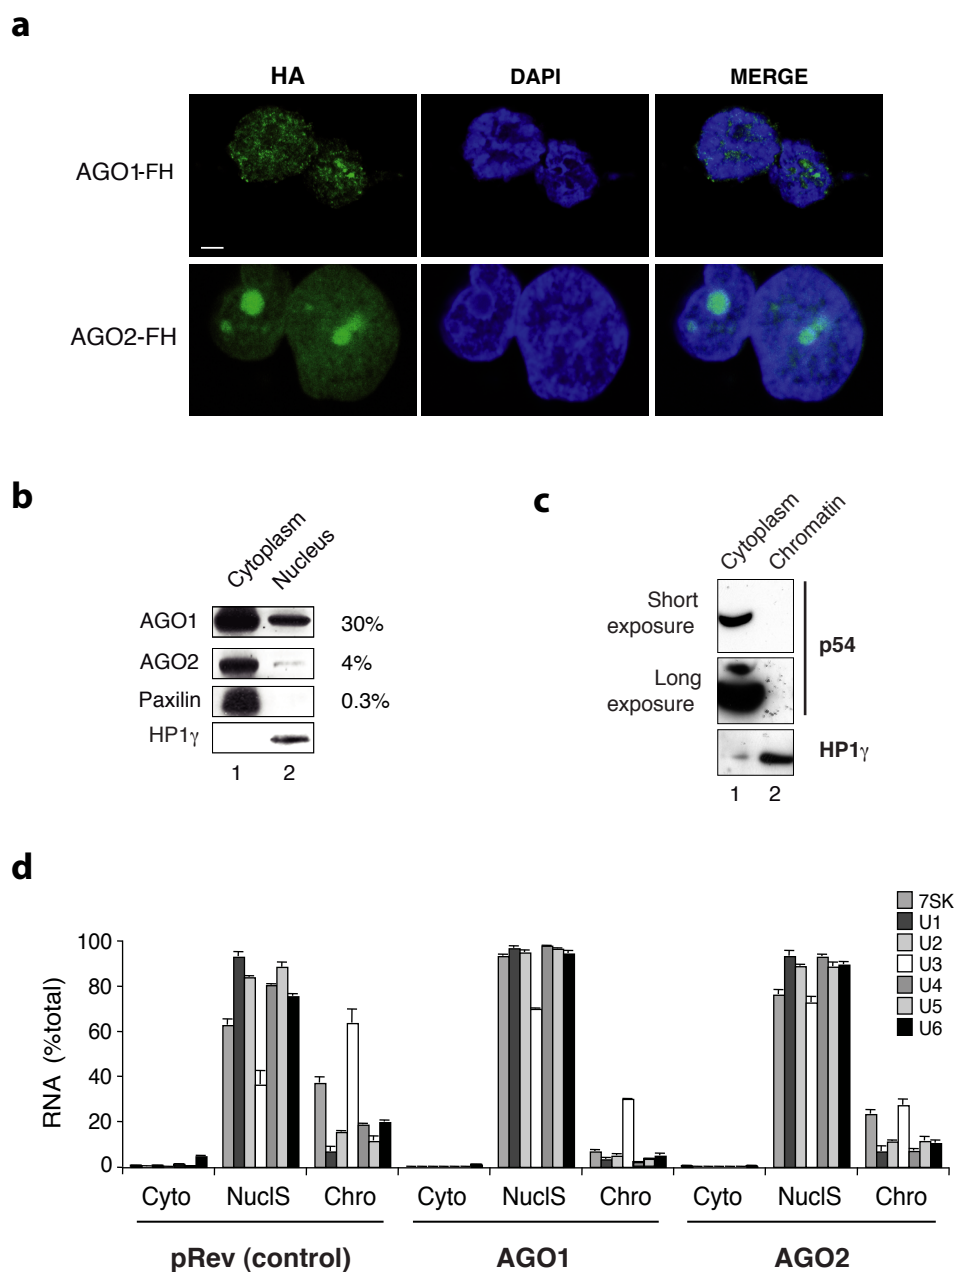

**Supplementary Figure 1. Tagged AGO proteins are partially located in the nucleus.** a) Nuclei of HeLa cells stably expressing AGO1-FH or AGO2-FH were purified on sucrose gradients and analyzed by indirect immunofluorescence using anti-HA antibodies; scale bar: 20  $\mu$ m. b) Cytoplasmic or nuclear (following sucrose gradients purification) fractions were analyzed by western blot with the indicated antibodies. Paxillin and HP1 $\gamma$  are cytoplasmic and nuclear markers respectively. c-d) Characterization of subcellular fractions: c) RCK/P54, a protein of the P-bodies, is not detected in the chromatin fraction. Fractionated extracts of HeLa cells (nuclei were purified on sucrose gradients prior to chromatin extraction) were analyzed by western blot with anti-P54/RCK antibodies (two exposures are shown) and with an antibody against the nuclear protein HP1 $\gamma$ . d) U-snRNAs and 7SK detection. Subcellular fractions of HeLa cells (as in b), stably transduced with an empty vector, AGO1-FH or AGO2-FH, were analyzed by RT-qPCR; Cyto: cytoplasm; NuclS : Nuclear soluble ; Chro : chromatin.

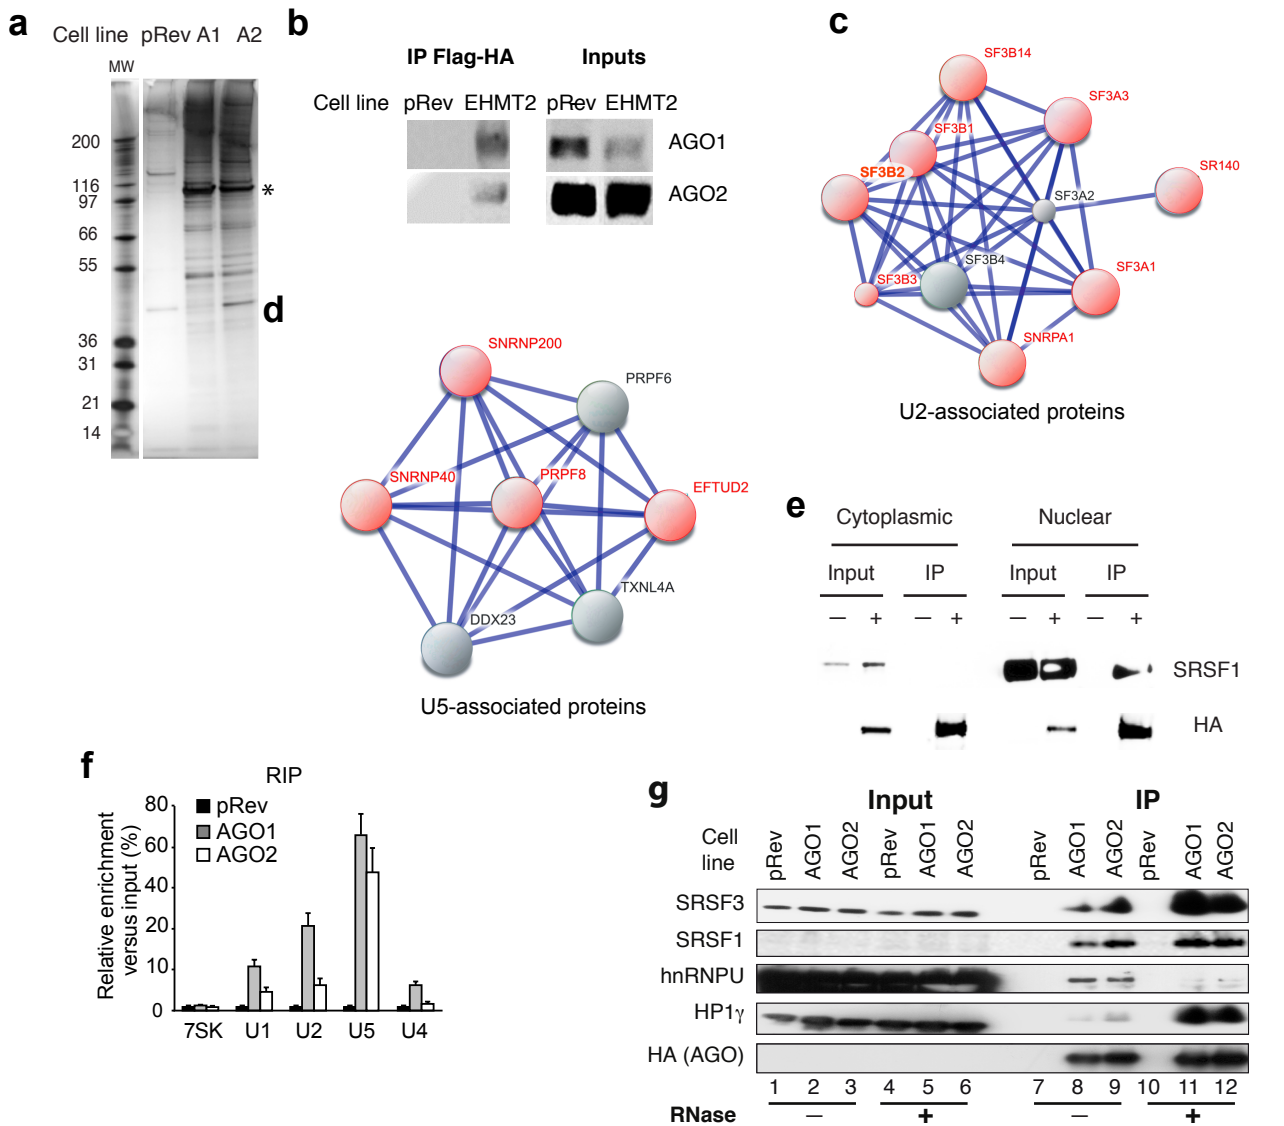

## Supplementary Figure 2. Characterization of chromatin AGO1 and -2 complexes

(a) Silver stain of FLAG-HA tandem affinity purified chromatin-AGO complexes from HeLa cells stably transduced with an empty vector (pRev), or expression vectors for AGO1-FH (A1) or AGO2-FH (A2). The major bands (\*) correspond to AGO1-FH and AGO2-FH. (b) EHMT2 interacts with AGO1-2. Extracts from HeLa S3 cells stably transduced with an empty vector (pRev) or a Flag-HA-EHMT2 (G9a) expression vector were used for tandem immunoprecipitations. Proteins were detected using the indicated antibodies. (c-d) U2 and U5 snRNPs as defined by Will and Lührmann (Cur. Opin. Cell Biol. 2001), modified with information from the « String » database (string-db.org); proteins detected in the human nuclear AGO1 and -2 complexes are indicated in red. Blue lines indicate physical interactions as documented in the String database. (e) SRSF1 is detected in AGO2 complexes in mouse cells. Nuclear extracts from C2C12 mouse myoblasts stably transduced with an empty vector (pRev) or an expression vector for AGO2-FH were used for immunoprecipitation assays with anti-HA antibodies, and analyzed by western blotting. (f) snRNAs associated with AGO1 and -2 complexes. Chromatin AGO1 and AGO2 complexes were isolated by tandem immunoprecipitation and snRNAs were quantified by RT-qPCR; Enrichments (relatively to the inputs) were normalized to control cells (empty vector, pRev) set to 1. (g) AGO association with SR protein resists RNase treatment. Extracts from HeLa-S3 transduced with an empty vector (pRev) or expression vectors for either AGO1-Flag-HA (AGO1-FH) or AGO2-Flag-HA (AGO2-FH) were treated (+) or not (+) with a mixture of RNases (controlled by detecting various RNAs, not shown); immunoprecipitated proteins were analyzed by western blotting using the indicated antibodies.

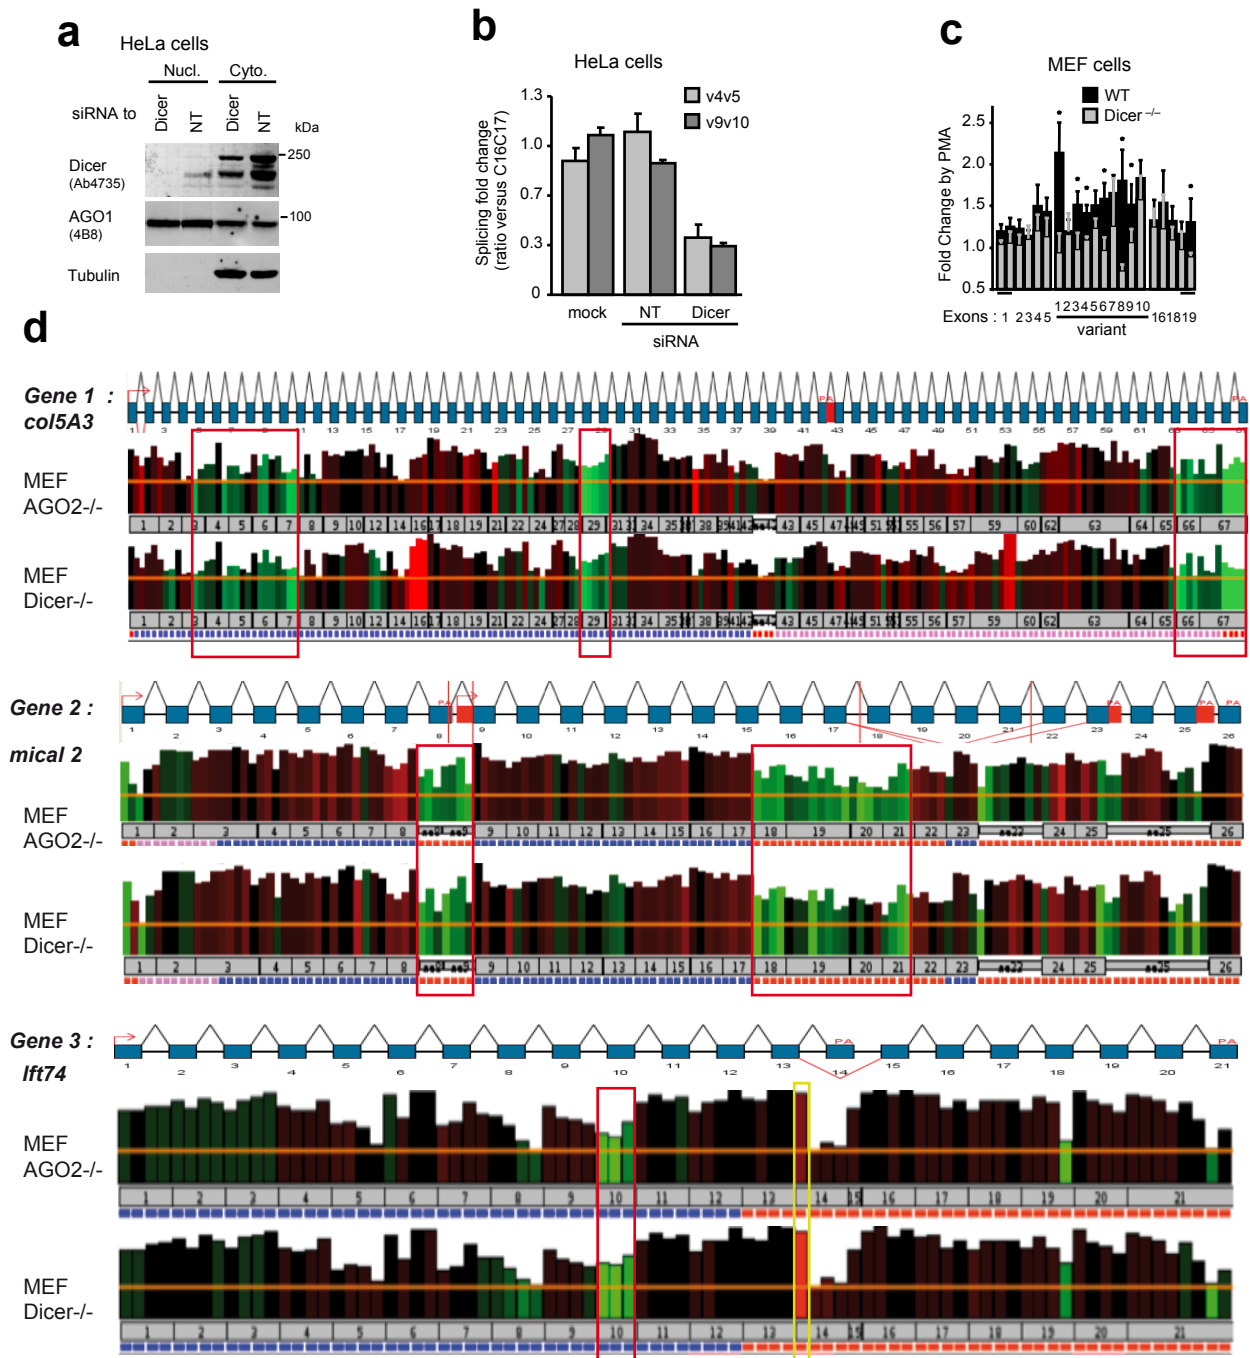

**Supplementary Figure 3. Dicer and AGO2 dependent alternative splicing** (a) Dicer is present in HeLa cell nucleus; HeLa cells were transfected with siRNA to Dicer or with control siRNA (siNT- non-targeting) as a negative control. Cytosolic (Cyto.) or Nuclear (Nucl.) extracts were analyzed by Western blotting using the indicated antibodies. (b-c) Dicer knockdown affects CD44 variant exon splicing. (b) HeLa cells were transfected as in a) with indicated siRNAs and treated with PMA overnight; total RNA was used for RT-qPCR reactions with the indicated primers; shown are the ratio between the variant forms v4v5 or v9v10 and the constant exons C16C17 normalized to control cells; (c) Dicer<sup>-/-</sup> MEFs were treated with PMA for 15 min and total RNA was analyzed on exon arrays (Genosplice technology); shown are the ratio between untreated and PMA-treated samples (mean  $\pm$  s. e. m. of three biological replicates). (d) MEFs with impaired splicing in AGO2<sup>-/-</sup> or Dicer<sup>-/-</sup> MEFs. Total RNA from MEF was analyzed as in b) (except that cells were not treated with PMA). Top: Exon-intron structure of the gene (blue boxes: exons; horizontal lines: introns). Below: results of exon arrays; Each bar corresponds to one probe, and four probes were used for each exon; Bar height (log<sub>2</sub> scale) corresponds to signal intensity. Red bars correspond to up-regulated probes, green bars to down-regulated probes and black bars correspond to unmodified probes. Background signal is indicated by an orange line. Exon numbers are indicated below, in grey rectangles; Color underneath indicates the splicing status: blue: region shared by at least 75% of transcripts, purple: regions shared by at least 50% and less than 75% of the transcripts; red: region shared by less than 50% of transcripts (according to Easana Visualization Module).

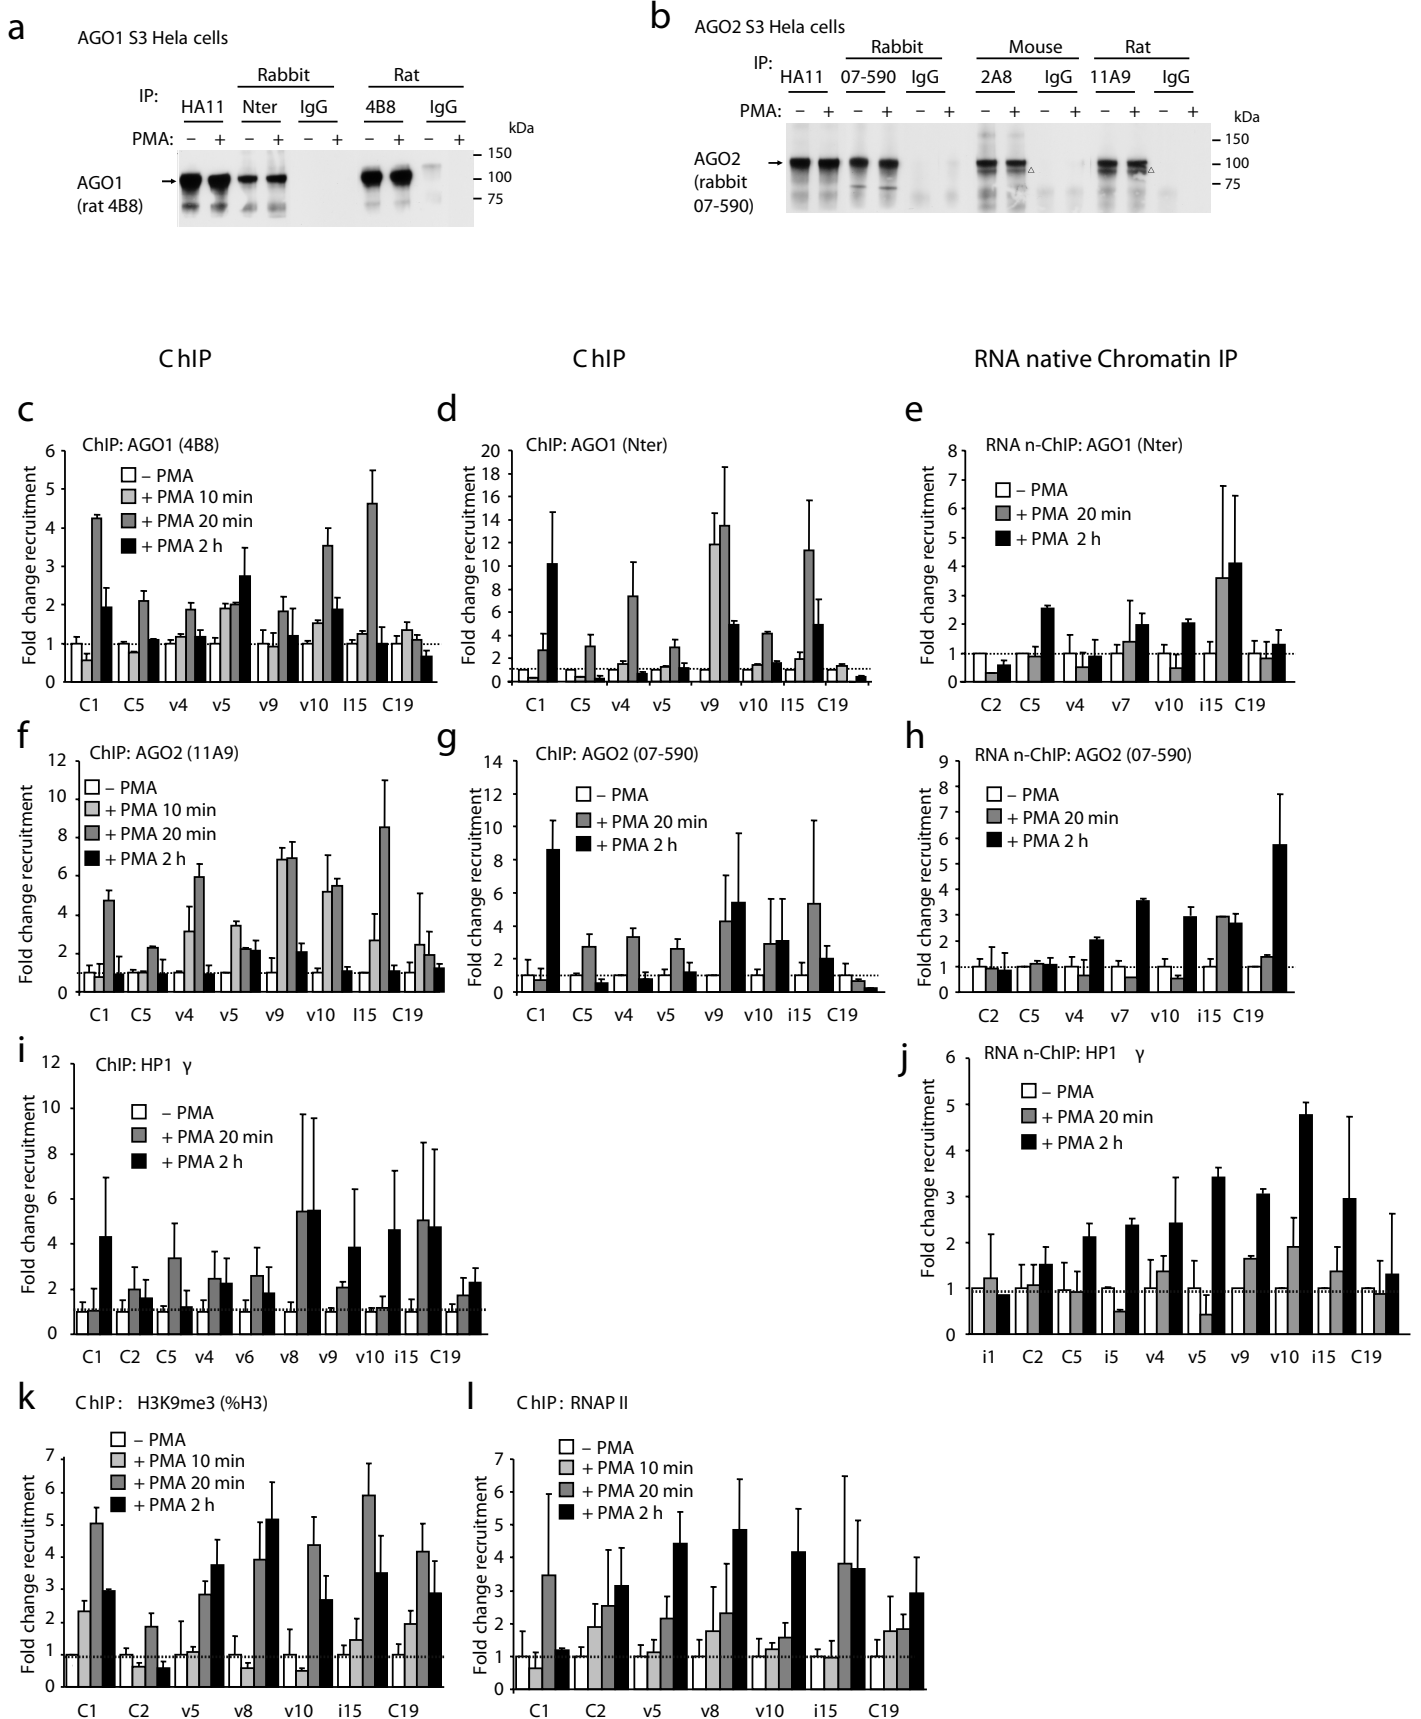

### Supplementary Figure 4. Kinetics of AGO and HP1 $\gamma$ recruitment, of H3K9 methylation and of RNAPol II accumulation

a-b) Immunoprecipitation efficiencies of anti-AGO1 or anti-AGO2 antibodies. HeLa S3 cells expressing AGO1-Flag-HA (a) or AGO2-Flag-HA (b) were treated (+), or not (-), with PMA for 2 h. Whole cell extracts were used for immunoprecipitation assays using specific antibodies or species-matched non immune IgGs as indicated. AGO1 and 2 proteins were detected by Western blotting using indicated antibodies. Arrows indicate tagged AGO proteins and triangles show the position of endogenous AGO2 protein. (c-l) : Kinetics of AGO1, AGO2, HP1 $\gamma$ , H3K9Me3 and RNAPII recruitment to *CD44* chromatin and nascent mRNA. HeLa cells were treated (+) or not (-) with PMA for the indicated periods of time and subjected to ChIP assays (c-i) or RNA native Chromatin IP (RNA n-ChIP) assays (panels j-l). ChIP assays (c-i): Chromatin from formaldehyde-fixed cells was prepared as described in the Methods section. Extracts were used for immunoprecipitation, using indicated antibodies or species-matched non-immune IgGs. Note that different antibodies were used for ChIP: rat and rabbit anti-AGO1 (c,d) ; rabbit anti-AGO2 (e,f). Immunoprecipitated DNA was isolated and detected by qPCR using primers in the indicated regions of *CD44*. RNA n-ChIP (j-l): DNase-solubilized chromatin from non-fixed cells was prepared as described in the Methods section. Immunoprecipitated RNAs were isolated, treated with DNase, and detected by RT-qPCR using primers in the indicated regions of *CD44*. Values are presented as fold-change normalized to species-matched non immune IgGs, and expressed relatively to control samples (without PMA, dotted line). Note that H3K9me3 is expressed as a percentage of H3, and normalized to the control samples (without PMA). Data are means  $\pm$  s.e.m. from at least 4 independent experiments.

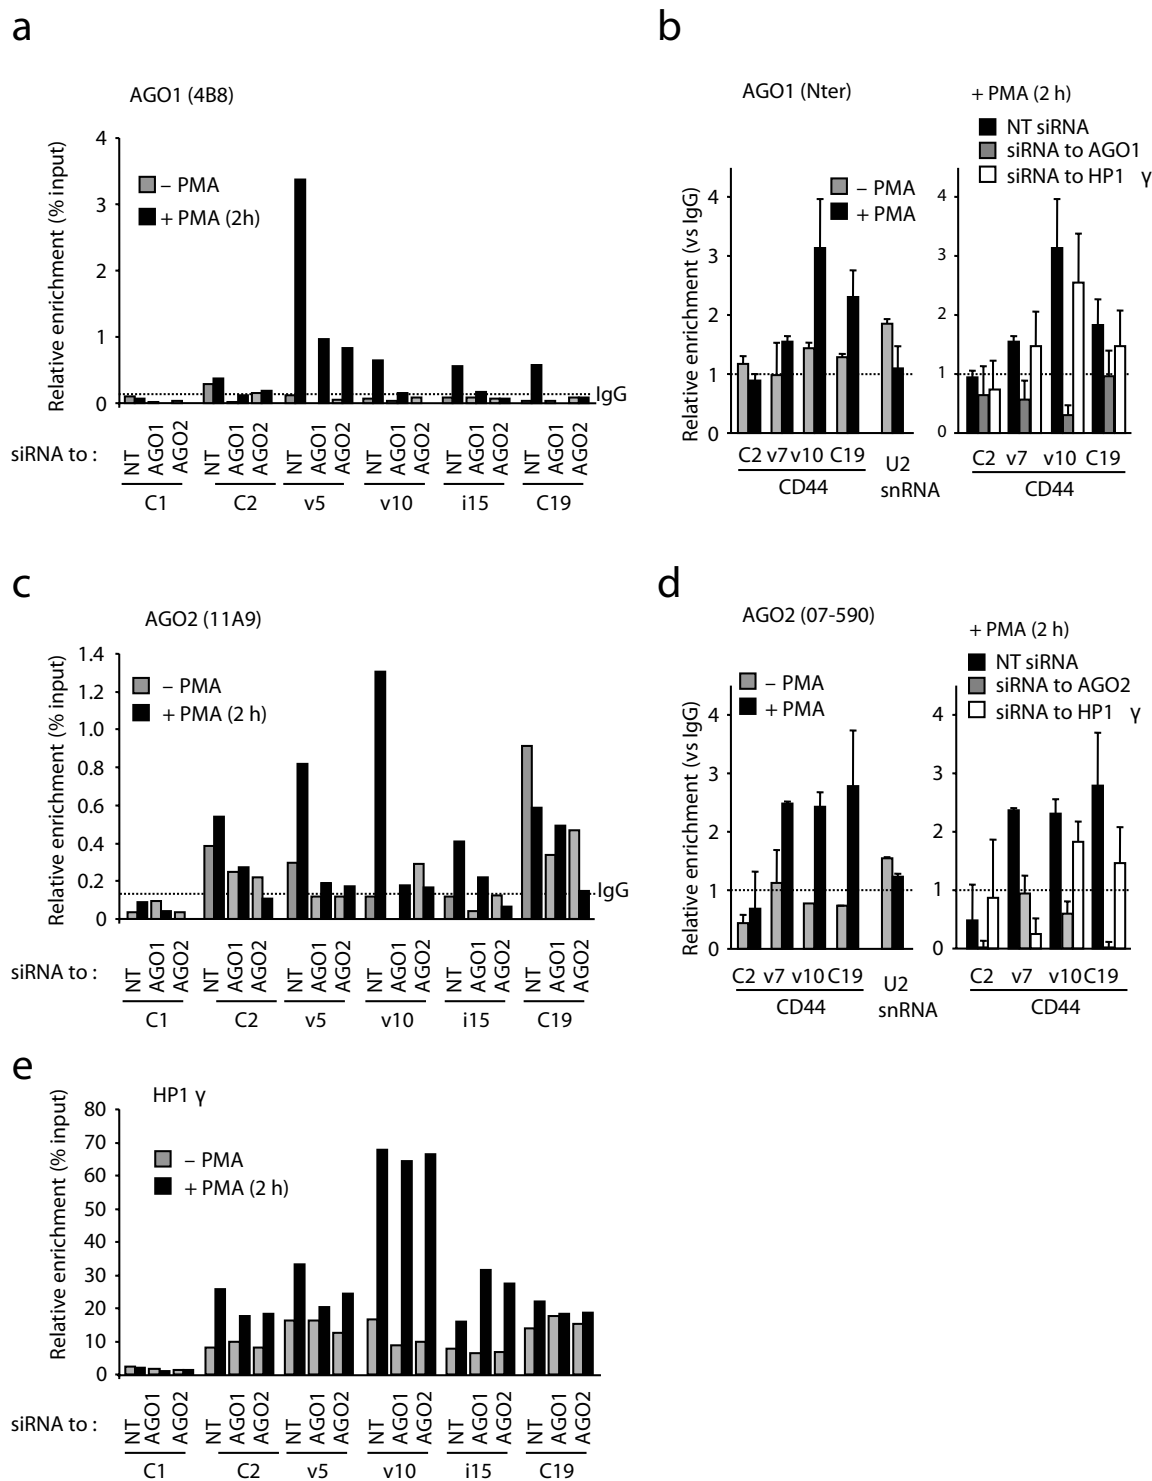

**Supplementary Figure 5. RNA native ChIP (RNA nCHIP) of AGO1-2 proteins and HP1 $\gamma$**  HeLa cells transfected with siRNAs to AGO1, AGO2, HP1 $\gamma$  or control siRNAs (siNT, non-targeting), or non-transfected cells were treated (+) or not (-) with PMA for 2h. DNase-solubilized chromatin was immunoprecipitated using the indicated antibodies or species matched non-immune IgGs. RNA was isolated, treated with DNase and detected by RT-qPCR using primers in the indicated regions of CD44. Values (a, c, and e: from one representative experiment; b, d: mean  $\pm$  SEM of two independent experiments) are relative to the inputs of control cells (not treated with PMA); Backgrounds levels (IgGs) are indicated by dotted lines.

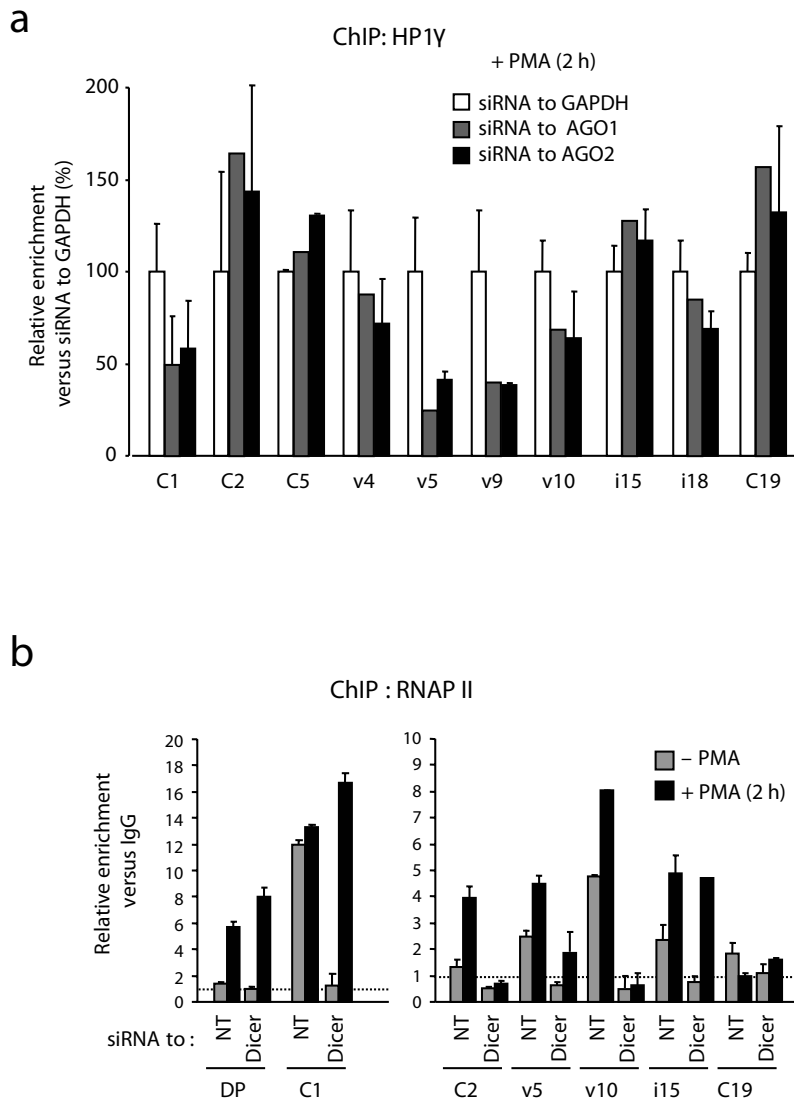

**Supplementary Figure 6. HP1 $\gamma$  recruitment depends on AGO protein and RNAPII accumulation depends on Dicer**

a) ChIP assays were carried out with chromatin from HeLa cells transfected with siRNA targeting GAPDH, AGO1 or AGO2, and further treated by PMA during 2 h; Binding of HP1 $\gamma$  was calculated relative to non-immune IgG and to siRNA-to-GAPDH-transfected cells. Values are means  $\pm$  s.e.m. of 2 experiments.

b) HeLa cells were transfected with the indicated siRNAs (siNT = control, non-targeting siRNA) and treated with PMA for 2 hrs. Chromatin was immunoprecipitated with either anti-RNAP II antibodies or non immune IgG, and used for qPCR amplification using indicated primers. Values were normalized to IgGs (dotted lines) and correspond to one representative experiment out of three.

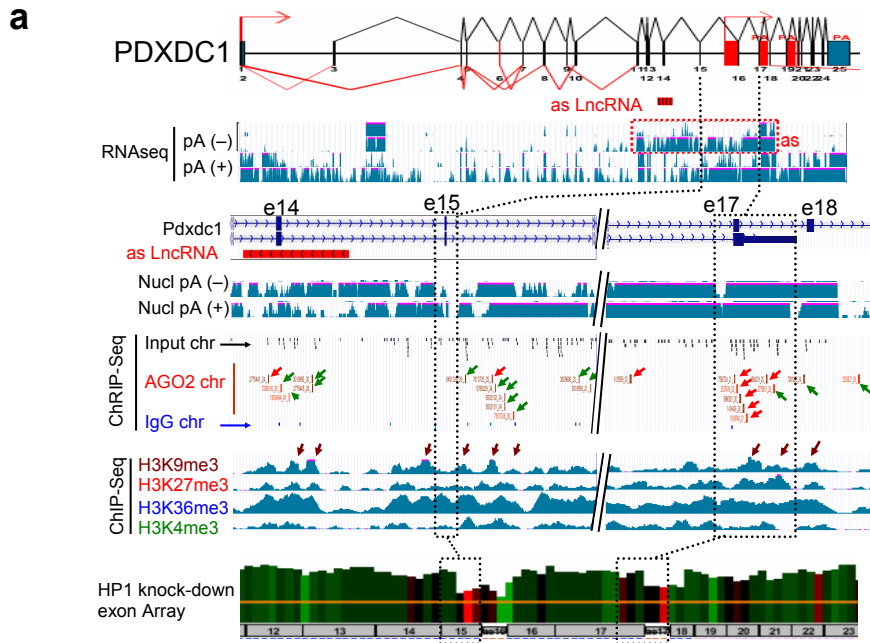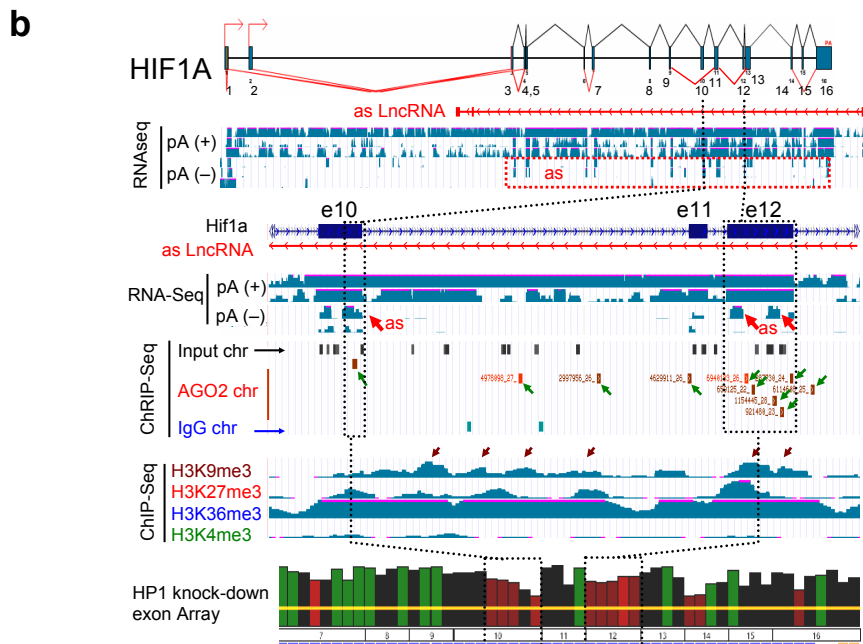

**c**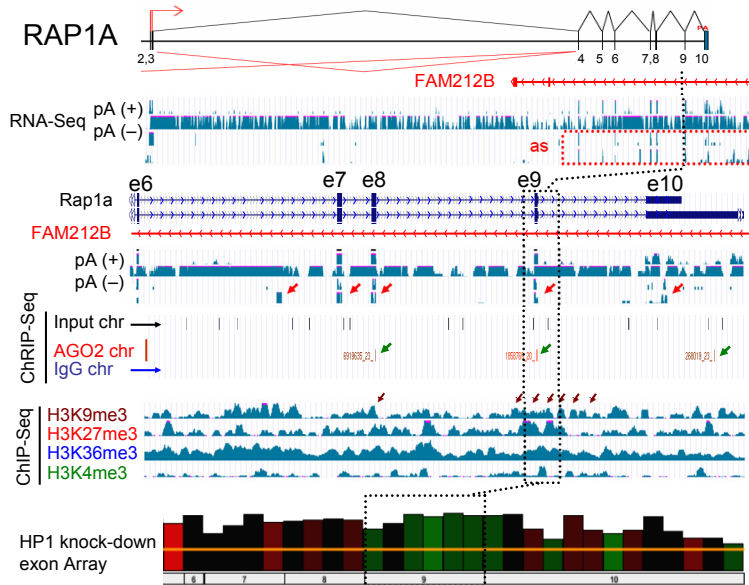**d**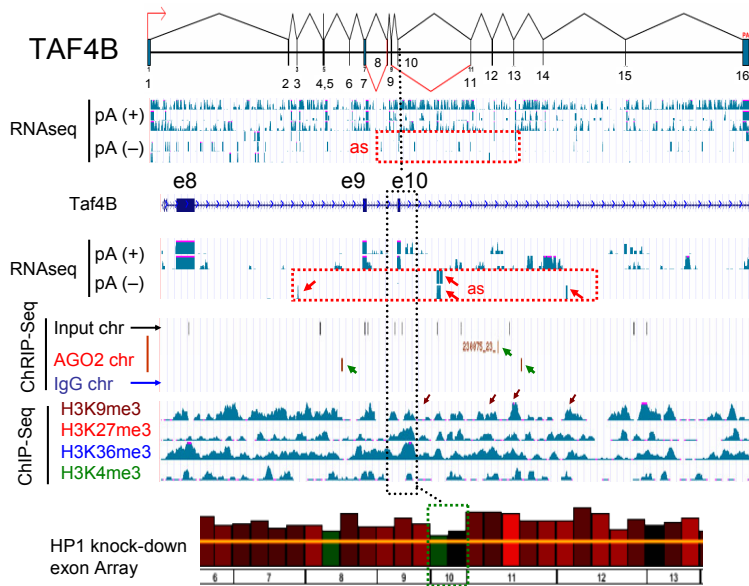



**e**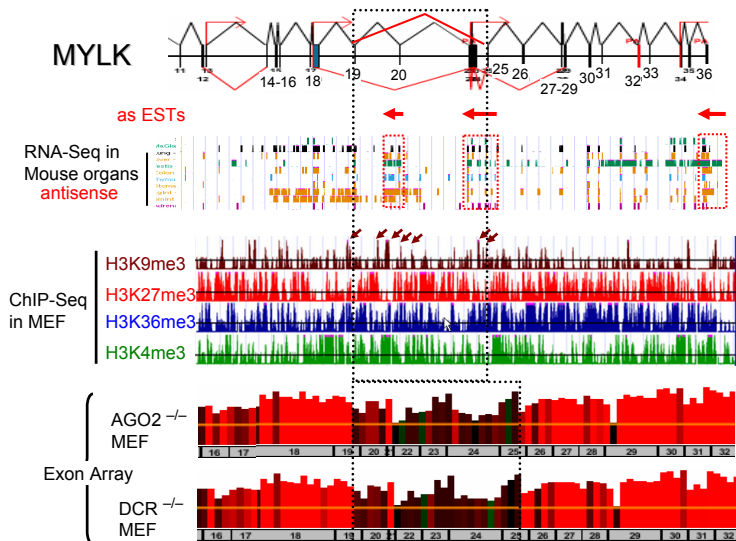**f**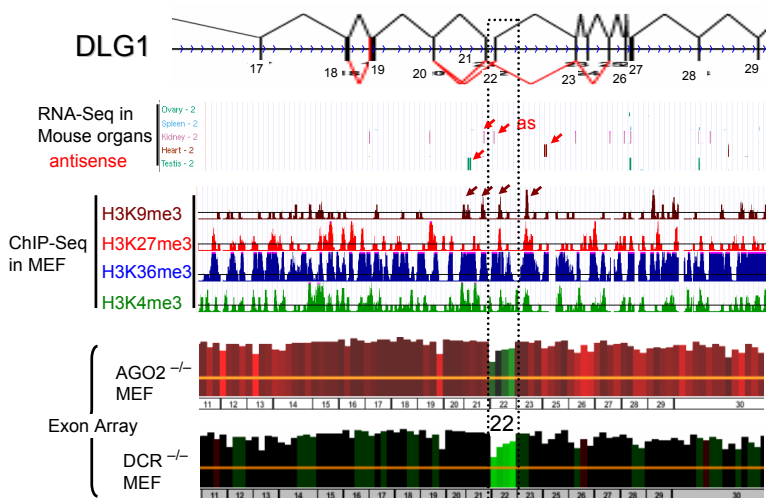**g**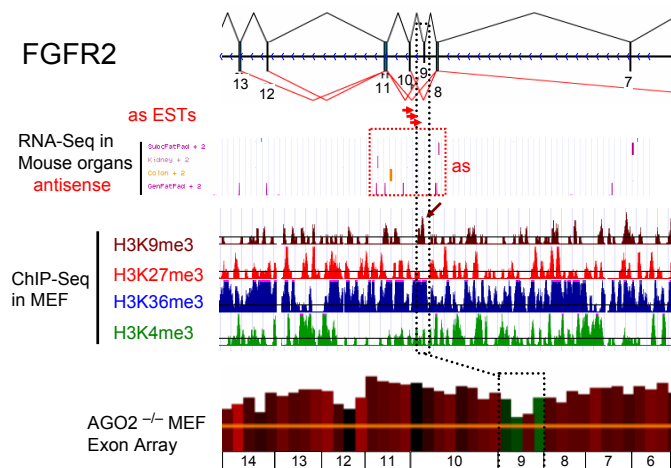

**h**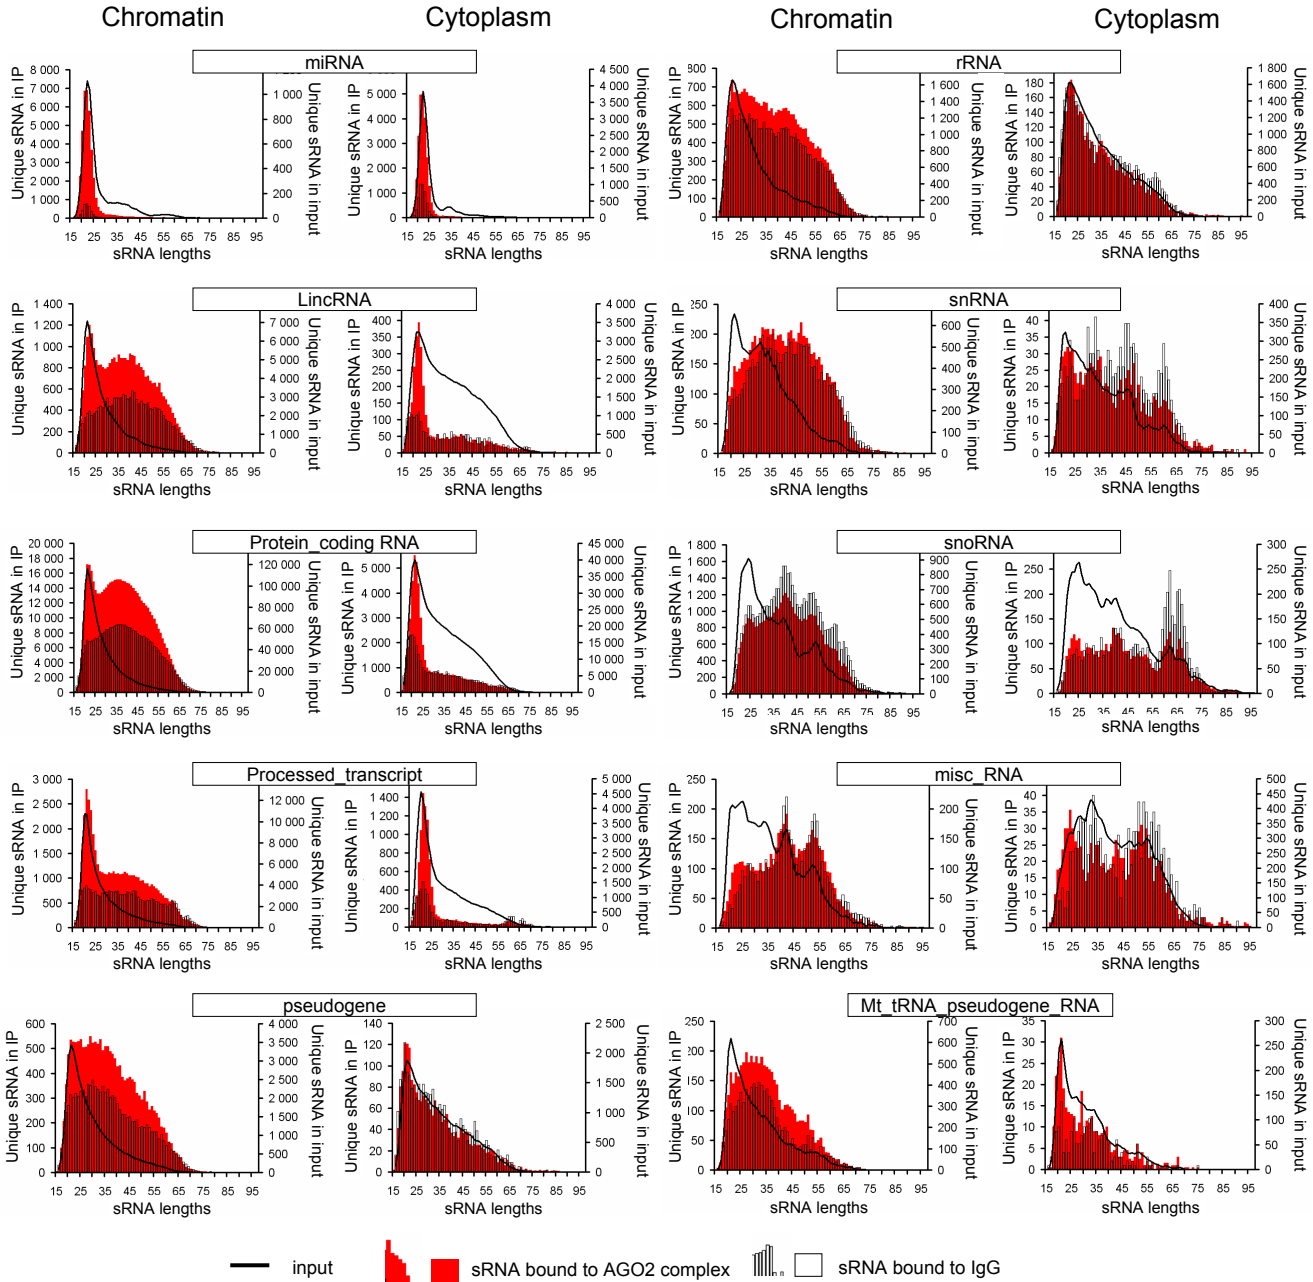

### Supplementary Figure 7. Examples of AGO2- or HP1 $\gamma$ -dependent genes with peaks of H3K9me3 and intragenic antisense transcripts.

Genes are PDXDC1 (pyridoxal-dependent decarboxylase) (a), HIF1A (hypoxia inducible factor 1, alpha) (b), RAP1A (RAS-related protein-1a) (c), and TAF4B (TATA box associated factor 4B) (d), MYLK (myosin, light polypeptide kinase) (e), DLG1 (Discs, large homolog 1 (Drosophila)) (f), and FGFR2 (g).

For each gene pictured, a **map** in the top section indicates the position of exons with alternative events in red. Antisense transcripts are indicated in red below the maps (Lnc RNA), annotated either as ESTs (human expressed sequence tag in GenBank) or in UCSC genecode genes V11 (Human GRCh37/hg19 assembly) (a-d) or in mouse (Mouse NCBI37/mm9 genome assembly) (e-g). The **RNA-Seq** tracks below the map show the sense (+) and antisense (-) transcripts from poly-adenylated (pA) transcripts in HeLa cells in CHSL Long RNA-Seq (human GRCh37/hg19 genome assembly) (a-d). RNA sequencing data from different organs in CHSL Long RNA-Seq (Mouse NCBI37/mm9 genome assembly).. Only antisense transcript signals are shown (e-g). The red dotted boxes and red arrows delineate antisense transcription.

In human genes (a-d) an enlargement of the region affected by HP1 knock-down with exons and the position of the intragenic antisense transcript in red, followed by the localization of sRNA in our **ChRIP-Seq** experiment. Deep sequencing was performed in HeLa cells on RNA from input (black) or extracts immunoprecipitated with either IgGs (blue) or with anti-AGO2 antibodies (red), from chromatin (chr) fractions (as indicated in Fig 2). Bars indicate the positions of sRNA reads (19-30 nt). Green and red arrows point to the positions of sRNAs in the sense and antisense orientations, respectively.

Below, the **ChIP-Seq** tracks show histone H3 methylation marks in HeLa cells (from ENCODE/Broad Institute, on the Human hg19 assembly, a-d) or in MEFs (data from Broad Institute on the Mouse NCBI36/mm8 assembly, e-g). Peaks of H3K9me3 signal are highlighted by brown arrows.

In human genes (a-d), at the bottom are shown the results of **Affymetrix exon arrays** performed using RNA extracted from HeLa cells treated with siRNAs to HP1 $\gamma$  or GAPDH (Saint André et al., 2011). In mouse genes (e-g) at the bottom are shown the exon arrays performed using RNAs from AGO2<sup>-/-</sup> and Dicer<sup>-/-</sup> MEFs as described in Supplementary figure 3. Figures were obtained using the Easana visualization interface (GenoSplice technology). Each bar corresponds to one probe. Bar height corresponds to the intensity of the signal (indicated in a log 2 scale); black bars indicate unmodified signal, red bars indicate signal up-regulated and green bars indicate signal down-regulated in the indicated cells. The orange line indicates the background signal. Exons, delineated below the bars graph by white rectangles, were detected by at least four different probes (bars). **h**) Lengths of the sRNAs bound to AGO2.ca (red) or to control IgGs (grey) were aligned versus the indicated Ensembl biotypes; read numbers are represented by bar length. Black line: sRNA lengths in input

Supplementary Tables 1, 2 and 3. Mass spectrometry analysis of AGO1 and AGO2-chromatin associated complexes.

Supplementary Table 1 : RNA Processing and Splicing

|                                      | Entry name                    | Accession number | Accession number | MW     | AGO1 IP <sup>a</sup> | AGO2 IP <sup>a</sup> | REF   |
|--------------------------------------|-------------------------------|------------------|------------------|--------|----------------------|----------------------|-------|
| <b>Core of the RISC Complex</b>      | Argonaute-1                   | NP_036331        | Q9UL18           | 97.0   | 23/27,3              | 5/4,6                | 1     |
|                                      | Argonaute-2                   | NP_036286        | Q9UKV8           | 97.0   | 2/2,9                | 23/25,7              | 1     |
|                                      | Argonaute-4                   | NP_060099        | Q9HCK5           | 96.9   | 1/1,4                | -                    | -     |
|                                      | TNR6A                         | NP_055309        | Q8NDV7           | 21.0   | -                    | 2/1,7                | 1     |
|                                      | TNC6B                         | NP_001155973     | Q9UPQ9           | 18.2   | -                    | 7/1,7                | 1,2,3 |
| <b>hnRNP</b>                         | hnRNPA3                       | NP_919223        | P51991           | 39.4   | 4/7,7                | 3/6,9                | 1     |
|                                      | hnRNPC                        | NP_112604        | P07910           | 33.5   | 5/14,7               | 4/14,1               | 1,2   |
|                                      | hnRNPL1                       | NP_001139653     | O60812           | 32.1   | 7/18,8               | 3/11,3               | -     |
|                                      | hnRNPD                        | NP_112738        | Q14103           | 38.3   | 2/6,2                | 2/6,2                | 1     |
|                                      | hnRNPF                        | NP_001091678     | P52597           | 45.5   | -                    | 1/4,1                | 1,2   |
|                                      | hnRNPH1                       | NP_005511        | P31943           | 49.0   | 3/9,6                | 5/16,5               | 1     |
|                                      | hnRNPH3                       | NP_036339        | P31942           | 36.9   | -                    | 2/8,4                | -     |
|                                      | hnRNPK                        | NP_112553        | P61978           | 50.9   | 5/14,7               | 9/24,6               | 1     |
|                                      | hnRNPL                        | NP_001524.2      | P14866           | 64     | 4/12,4               | 1/4,7                | 1,2   |
|                                      | hnRNPM                        | NP_005959        | P52272           | 77.4   | 7/12,3               | 8/15,8               | 1     |
|                                      | hnRNPR                        | NP_001095868     | O43390           | 70.8   | 4/7,4                | 2/4,1                | 1     |
|                                      | hnRNPU                        | NP_114032        | Q00839           | 90.4   | 9/12,5               | 9/12,3               | 1,2   |
|                                      | hnRNPU2                       | NP_001073027     | Q1KMD3           | 88.1   | 4/3,6                | 1/1,9                | -     |
|                                      | PCBP2                         | NP_005007        | Q15366           | 35.3   | -                    | 1/3,6                | 1,2   |
|                                      | RALY                          | NP_057951        | Q9UKM9           | 32.4   | 4/13,4               | -                    | 1     |
|                                      | RALYL                         | NP_001093861     | Q86SE5           | 32.3   | 1/4,1                | -                    | -     |
|                                      | hnRNPG                        | NP_002130        | P38159           | 55.8   | 2/6,9                | 2/6,9                | 1     |
| hnRNPP                               | NP_006363                     | O60506           | 69.5             | 5/9,3  | -                    | 1                    |       |
| <b>U2 snRNP</b>                      | SF3A1                         | NP_005868        | Q15459           | 88.9   | -                    | 3/7,1                | -     |
|                                      | SF3A3                         | NP_006793        | Q12874           | 58.8   | -                    | 1/2,4                | -     |
|                                      | SF3B1                         | NP_036565        | O75533           | 145.8  | -                    | 3/3,1                | -     |
|                                      | SF3B2                         | NP_006833        | Q13435           | 100.2  | 3/6,1                | 1/3,3                | -     |
|                                      | SF3B3                         | NP_036558        | Q15393           | 135.6  | -                    | 5/5,3                | -     |
|                                      | SF3B14                        | NP_057131.1      | Q9Y3B4           | 14.6   | -                    | 1/9,6                | -     |
|                                      | SNRPA1                        | NP_003081        | P09661           | 28.4   | -                    | 3/16,5               | -     |
| <b>U5 snRNP</b>                      | U5-116 kDa                    | NP_004238        | Q15029           | 109.4  | -                    | 2/3,1                | -     |
|                                      | PRP8                          | NP_006436.3      | Q6P2Q9           | 273.6  | -                    | 2/0,6                | -     |
|                                      | U5-200KD                      | NP_054733        | O75643           | 67.9   | -                    | 2/1,1                | -     |
|                                      | SNRNP40                       | NP_004805        | Q96DI7           | 39.3   | -                    | 1/2,8                | -     |
| <b>SR/Sm proteins</b>                | RBM39                         | NP_909122        | Q14498           | 59.3   | -                    | 2/4,9                | -     |
|                                      | SNRPD1                        | NP_008869        | P62314           | 13.3   | 1/10,9               | -                    | -     |
|                                      | SNRPD2                        | NP_004588        | P62316           | 13.5   | 01/16,2              | -                    | -     |
|                                      | SNRPD3                        | NP_004166        | P62318           | 13.9   | 1/7,9                | 1/7,9                | -     |
|                                      | SNRPEL1                       | CAH73282         | Q5VYJ4           | 10.7   | 2/12,1               | 2/25,01              | -     |
|                                      | SRSF1                         | NP_008855        | Q07955           | 27.7   | 1/5,7                | -                    | -     |
|                                      | SRSF3                         | NP_003008        | P84103           | 19.3   | 1/5,8                | 1/8,5                | -     |
|                                      | SRSF7                         | NP_001026854     | Q16629           | 27.3   | 4/21,4               | -                    | -     |
|                                      | SRSF10                        | NP_004584        | P62995           | 33.6   | -                    | 1/5,6                | -     |
|                                      | <b>Other Splicing Factors</b> | TARDBP           | NP_031401        | Q13148 | 44.7                 | 1/2,9                | 2/5,1 |
| RBM8                                 |                               | NP_001244.1      | Q99459           | 140.5  | -                    | 1/1,6                | -     |
| PRP19                                |                               | NP_055317.1      | Q9UMS4           | 55.1   | -                    | 2/4,2                | -     |
| PTBP1                                |                               | NP_002810.1      | P26599           | 57.2   | 1/3,8                | 5/11,7               | -     |
| PTBP2                                |                               | NP_067013.1      | Q9UKA9           | 57.4   | -                    | 1/1,5                | -     |
| RBM16                                |                               | NP_055707.3      | Q9UPN6           | 52.1   | -                    | 1/0,9                | -     |
| SF4                                  |                               | NP_757386        | Q81WZ8           | 72.4   | -                    | 1/2,1                | -     |
| SKIV2L2                              |                               | NP_056175        | P42285           | 117.8  | -                    | 1/1,7                | -     |
| ACINUS                               |                               | NP_055792        | Q9UKV3           | 151.8  | -                    | 1/0,9                | -     |
| <b>RNA metabolism and processing</b> | ELAV1                         | NP_001410        | Q15717           | 36.0   | 6/25,8               | 6/20,6               | 1,2   |
|                                      | ILF2                          | NP_004506        | Q12905           | 43.0   | 6/20,8               | 6/19,7               | 1,2   |
|                                      | ILF3                          | NP_036350        | Q12906           | 95.3   | 3/4,7                | -                    | 1,2   |
|                                      | ROD1                          | BAA75466         | O95758           | 59.6   | -                    | 1/3,8                | -     |
|                                      | SKIV2L2                       | NP_056175        | P42285           | 117.8  | -                    | 1/1,1                | -     |
|                                      | SON                           | NP_620305        | P18583           | 263.8  | -                    | 1/0,6                | -     |
| <b>RNA Helicases</b>                 | DDX17                         | NP_006377        | Q92841           | 72.3   | 1/1,8                | 2/3,5                | 1     |
|                                      | DDX21                         | NP_004719        | Q9NR30           | 87.3   | 3/4,7                | -                    | 2     |
|                                      | DDX39                         | NP_005795        | O00148           | 49.1   | -                    | 1/2,3                | 2     |
|                                      | DDX48                         | NP_055555        | P38919           | 46.8   | -                    | 3/6,8                | 2     |
|                                      | DHX15                         | NP_001349        | O43143           | 90.9   | 1/1,5                | 3/3,1                | -     |
|                                      | DHX9                          | NP_001348        | Q08211           | 140.9  | 9/8,4                | 4/4,7                | 1,2   |
| <b>Editing factor</b>                | DSRAD                         | NP_001102        | P55265           | -      | -                    | 1/1,2                | 1     |

Identified proteins were classified in specific tables according to their molecular functions. a number of peptides identified/ % protein coverage.

Previously characterized AGO proteins partners are referenced

Supplementary Table 2 : Chromatin organization

|                                   | Entry name  | Accession number | Accession number | MW    | AGO1<br>ip <sup>a</sup> | AGO2<br>ip <sup>a</sup> | REF |
|-----------------------------------|-------------|------------------|------------------|-------|-------------------------|-------------------------|-----|
| <b>Histones</b>                   | H2A1A       | NP_734466        | Q96QV6           | 14,2  | -                       | 2/12,3                  | -   |
|                                   | H1.1        | Q02539           | Q02539           | 21,8  | -                       | 1/5,1                   | -   |
|                                   | H2A1D       | NP_066409        | P20671           | 14,1  | -                       | 1/8,5                   | -   |
|                                   | macro-H2A.1 | NP_001035248     | O75367           | 39,6  | -                       | 1/5,4                   | -   |
|                                   | H2B.1       | NP_066406        | P33778           | 13,9  | 1/12,1                  | 4/12,1                  | -   |
|                                   | H4          | NP_778224        | P62805           | 11,3  | 1/9,7                   | 5/40,8                  | -   |
|                                   | H4-B        | AAH69467         | Q6DRA9           | 11,3  | -                       | 1/9,7                   | -   |
| <b>Transcriptional regulation</b> | HDAC1       | NP_004955        | Q13547           | 55,1  | -                       | 2/6,4                   | -   |
|                                   | RBM14       | NP_006319.1      | Q96PK6           | 69,4  | -                       | 1/2,2                   | -   |
|                                   | Sam68       | NP_006550        | Q07666           | 48,2  | 1/3,2                   | -                       | -   |
|                                   | SMRC2       | NP_003066        | Q8TAQ2           | 132,6 | -                       | 1/1,7                   | -   |
|                                   | RUVB1       | NP_003698        | Q9Y265           | 50,2  | -                       | 3/9,1                   | -   |
|                                   | RUVB2       | NP_006657        | Q9Y230           | 51,1  | -                       | 3/5,8                   | 2   |
|                                   | MATR3       | NP_001181884     | P43243           | 94,6  | 6/10,9                  | 8/15,8                  | 2   |
|                                   | ERBB4       | NP_005226        | Q15303           | 146,8 | -                       | 01/16,01                | -   |
|                                   | DBC-1       | NP_066997        | Q8N163           | 102,9 | -                       | 1/16,01                 | -   |
|                                   | RBBP7       | CAG46502         | Q16576           | 47,8  | -                       | 1/3,1                   | -   |
| ZN326                             | NP_892021   | Q5BKZ1           | 65,6             | 1/2,7 | -                       | 2                       |     |
| <b>HP1 and its partners</b>       | CBX3        | NP_057671        | Q13185           | 20,8  | -                       | 1/7,1                   | -   |
|                                   | TIF1-β      | NP_005753        | Q13263           | 88,5  | -                       | 1/1,1                   | -   |
|                                   | Suv39H1     | NP_003164        | O43463           | 47,9  | -                       | 5/14,8                  | -   |
| <b>DNA damage</b>                 | PRKDC       | NP_008835        | P78527           | 469,0 | -                       | 1/0,3                   | -   |
|                                   | TOP2A       | NP_001058        | P11388           | 174,3 | -                       | 1                       | -   |
| <b>Nuclear Organization</b>       | Lamin A/C   | NP_733821        | P02545           | 74,1  | -                       | 33/50,2                 | -   |
| <b>Chromosome segregation</b>     | SMC-3       | NP_005436        | Q9UQE7           | 141,5 | -                       | 1/1,6                   | -   |

Supplementary Table 3 :

|                                  | Entry name   | Accession number | Accession number | MW    | AGO1<br>ip <sup>a</sup> | AGO2<br>ip <sup>a</sup> | REF |
|----------------------------------|--------------|------------------|------------------|-------|-------------------------|-------------------------|-----|
| <b>Chaperons</b>                 | HS90A        | NP_005339        | P07900           | 84,6  | -                       | 1/1,9                   | 1   |
|                                  | DNAJB6       | CAG38529         | O75190           | 36    | -                       | 1/4,1                   | -   |
|                                  | HSP71        | NP_005336        | P08107           | 70,0  | -                       | 1/2,5                   | 1   |
|                                  | HSP7C        | NP_006588        | P11142           | 70,0  | -                       | 1/1,9                   | -   |
|                                  | NPM          | NP_002511        | P06748           | 32,5  | -                       | 1/7,1                   | -   |
|                                  | TCPE         | NP_036205        | P48643           | 59,6  | -                       | 1/3,01                  | -   |
| <b>Cytoskeleton organization</b> | Tubulin beta | CAA56071         | Q5JP53           | 49,9  | 1/3,5                   | -                       | -   |
| <b>Apoptosis</b>                 | DBC-1        | NP_066997        | Q8N163           | 102,9 | -                       | 1                       | -   |
| <b>Nuclear miRNA processing</b>  | SRRT         | NP_001122325     | Q9BXP5           | 100,6 | -                       | 1                       | -   |
| <b>Protein and mRNA nuclear</b>  | XPO1         | NP_003391        | O14980           | 123,3 | -                       | 1/1,1                   | -   |
| <b>Protein nuclear import</b>    | IMB1         | NP_002256        | Q14974           | 97,1  | -                       | 1/1,7                   | -   |
| <b>GTPase activity</b>           | SI1L2        | NP_065859        | Q9P2F8           | 190,4 | -                       | -                       | -   |
| <b>Defense response</b>          | MLF2         | NP_005430        | Q15773           | 28,1  | -                       | 2/8,5                   | -   |
| <b>Unknown function</b>          | CU070        | Q9NSI2           | Q9NSI2           | 25,4  | -                       | 1/6,1                   | -   |

Identified proteins were classified in specific tables according to their molecular functions. a number of peptides identified/ % protein coverage.

Previously characterized AGO proteins partners are referenced

**Supplementary Table 4. Peptides detected by Spectrometry in extracts from control cells.**

| Entry name                                                       | Accession number | peptide number |
|------------------------------------------------------------------|------------------|----------------|
| PGRC1                                                            | NG_016756.1      | 1              |
| H2A1A                                                            | NP_734466.1      | 1              |
| H4 (Fragment)                                                    | Q6fqb8           | 1              |
| cDNA FLJ78387 : Ig-G like                                        | A8K008           | 1              |
| Mus musculus anti-human apolipoprotein A monoclonal antibody mAb | AF178454         | 1              |
| anti-colorectal carcinoma heavy chain                            | AAB28159.1       | 5              |

HeLa S3 cells transduced with an empty vehicle vector were processed as in Supplementary Table 1-3 (all samples were run in parallel) and analyzed by mass spectrometry.

**Supplementary Table 5. Effect of AGO2 or Dicer knockout on exon splicing.**

|                           | MEF AGO2 -/- | MEF DICER -/- | Common to both |
|---------------------------|--------------|---------------|----------------|
| Number of regulated exons | 6768         | 7875          | 2340           |
| down-regulated            | 1862         | 2587          | 479            |
| up-regulated              | 1690         | 2258          | 259            |

Fold change mutant cells vs. knockout cells > 1.5; p-value <0.05

**Supplementary Table 6 . Sequences of siRNAs used in this study.**

| siRNA                                  | SEQUENCES (sense)                                                                           |
|----------------------------------------|---------------------------------------------------------------------------------------------|
| scramble                               | UAGCAAUGACGAAUGCGUA                                                                         |
| EIF2C1                                 | CCAAGAAUUGUGCAAGUAA                                                                         |
| EIF2C1                                 | GCUACAACUUAGAUCCTUA                                                                         |
| EIF2C1 pool of 4 different siRNA       | GCACAGUAUUUCAAGCAGA,<br>CAACGAACGGGUCGACUUU,<br>UGACAAGAAUGAGCGAAUU,<br>GGAAGUACCGCGUGUGUAA |
| EIF2C2                                 | AGAUCCAUACGUCCGUGA                                                                          |
| EIF2C2 pool of 2 different siRNA       | GCACGACUGUGGACACGAA<br>CAAGCAGGCCUUCGCACUA                                                  |
| HP1 $\gamma$ pool of 2 different siRNA | AUCUGACAGUGAAUCUGAU<br>AGUACUAGAUCGACGUGUA                                                  |
| Dicer                                  | UGCUUGAAGCAGCUCUGGA                                                                         |
| GAPDH                                  | UGGUUUACAUGUCCAAUA                                                                          |

## References

- 1 Landthaler, M. *et al.* Molecular characterization of human Argonaute-containing ribonucleoprotein complexes and their bound target mRNAs. *RNA* **14**, 2580-2596 (2008).
- 2 Hock, J. *et al.* Proteomic and functional analysis of Argonaute-containing mRNA-protein complexes in human cells. *EMBO Rep* **8**, 1052-1060 (2007).
- 3 Meister, G. *et al.* Identification of novel argonaute-associated proteins. *Curr Biol* **15**, 2149-2155 (2005).
